# Supplementary material for: Improved low-temperature catalytic oxidation performance of Pt-based catalysts by modulating the electronic and size effects
Source: Royal Society of Chemistry journal article supplement (doi:10.1039/d0nj00550a), 2020-01-01
Supplement: d0nj00550a1.pdf [file d0nj00550a1.pdf]

## Supporting Information

### Improved low-temperature catalytic oxidation performance of Pt-based catalysts by modulating electronic and size effect

Liang Yanli <sup>a</sup>, Ding xinmei <sup>b</sup>, Wang jianli <sup>b</sup>, Zhao Ming <sup>b\*</sup>, Dan Yi <sup>a\*</sup>, Jiang Long <sup>a</sup>, Chen Yaoqiang <sup>b</sup>.

<sup>a</sup>: State Key Laboratory of Polymer Materials Engineering of China (Sichuan University), Polymer Research Institute of Sichuan University, Chengdu 610065, China. <sup>b</sup>: College of Chemistry of Sichuan University, Chengdu 610064, China

\*Corresponding author, Tel.: +86-28-85418451; Fax.: +86-28-85418451.

\*E-mail: danyi@scu.edu.cn; zhaoming@scu.edu.cn

Postal address: College of Chemistry of Sichuan University, Wangjiang Road 29, Chengdu 610064, China

### List of Supporting Information

**Fig. S1.** Schematic diagram of Reactor.

**Fig. S2.** H<sub>2</sub>-TPR curves of catalysts

**Fig. S3.** XPS curves of catalysts (a) Pt-PVA/SA-5h, (b) Pt-PVA/SA-10h, and (c) Pt-PVA/SA-20h.

**Fig. S4.** Fourier deconvolution on CO-FTIR patterns of reduced catalysts

**Fig. S5.** XRD patterns of the catalysts.

**Fig. S6.** (above) TEM patterns of catalysts and partial platinum particles recorded by red circle and (below) distribution of platinum particles after counting around 100 particles and fitting by gauss.

**Fig. S7.** The repeatable test of the catalytic performance on Pt-PVA/SA-10 h.

**Table S1** The dispersion and average grain size of different samples.

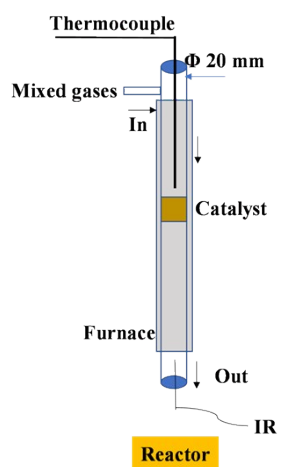

**Fig. S1.** Schematic diagram of Reactor.

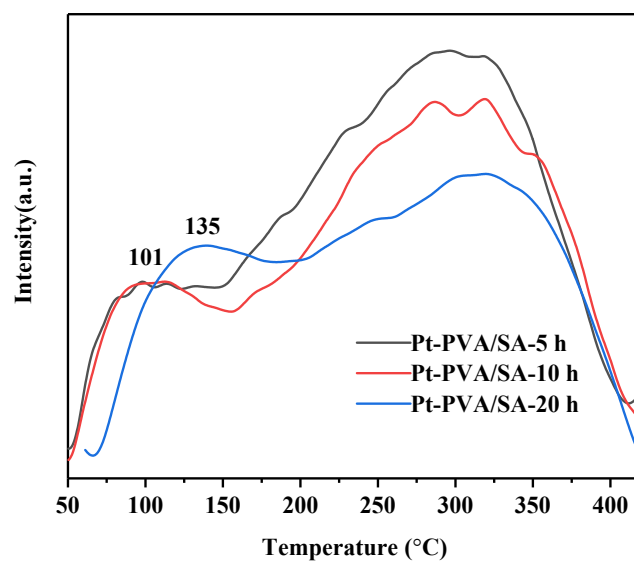

**Fig. S2.** H<sub>2</sub>-TPR curves of catalysts

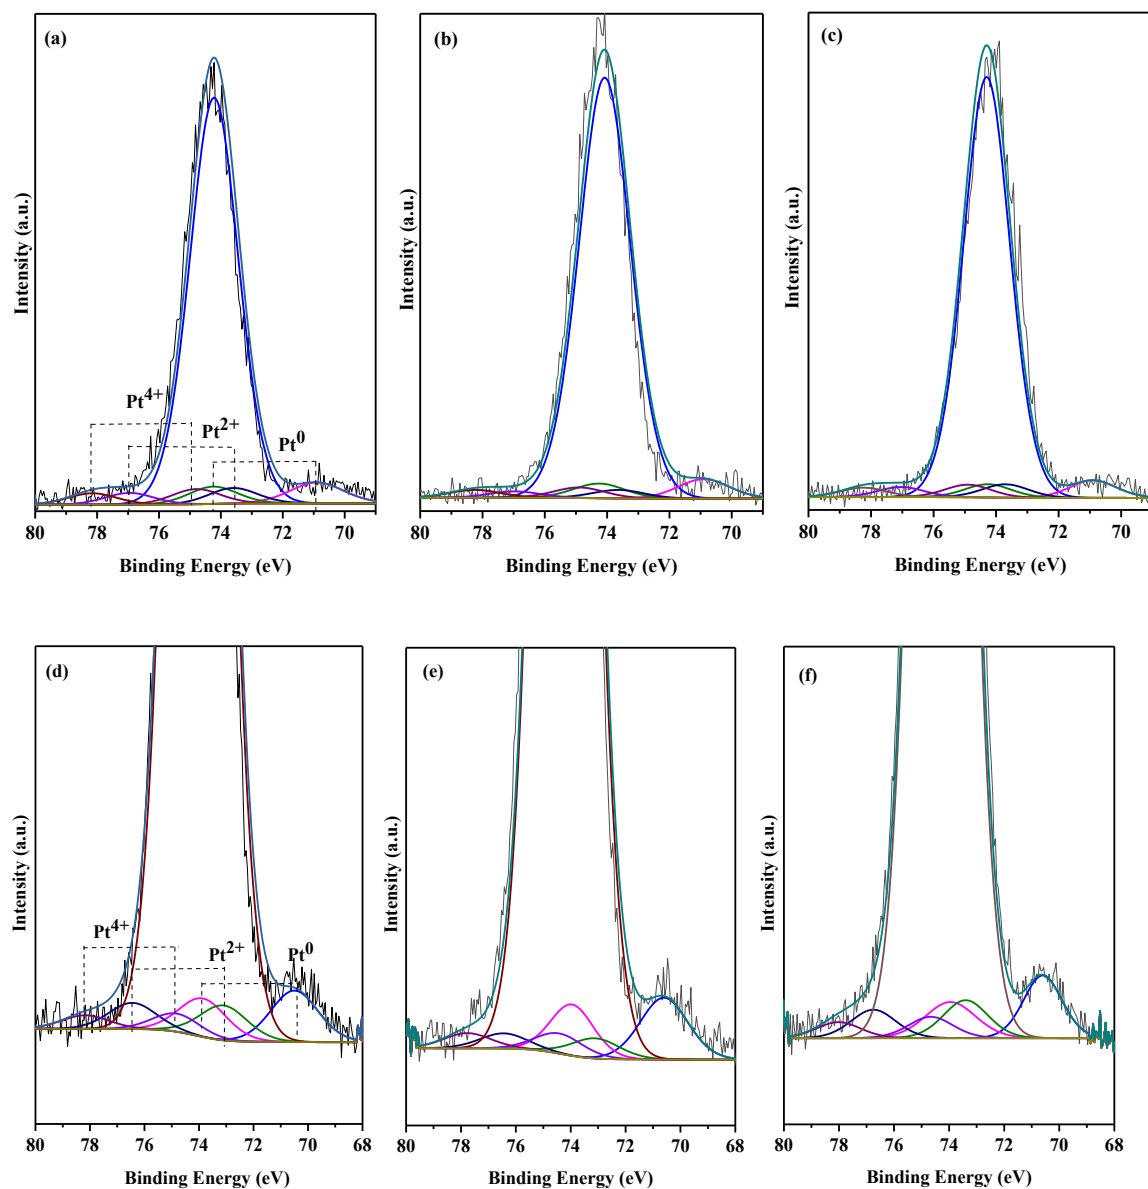

**Fig. S3** XPS curves of calcinated and degreened catalysts: (a, d) Pt-PVA/SA-5h, (b,e) Pt-PVA/SA-10h, and (c, f) Pt-PVA/SA-20h.

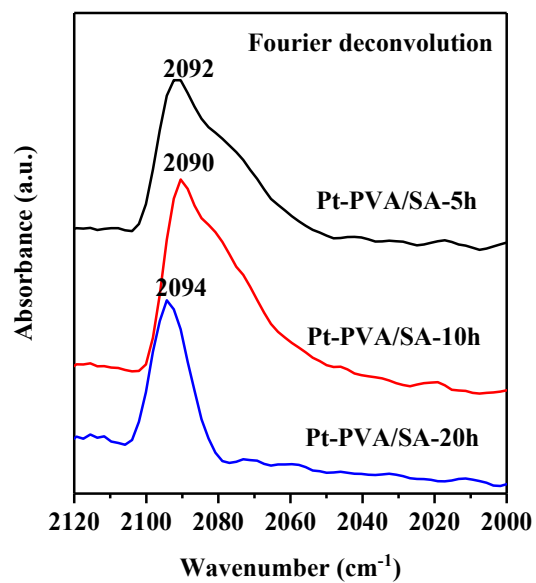

Fig. S4 Fourier deconvolution on CO-FTIR patterns of reduced catalysts

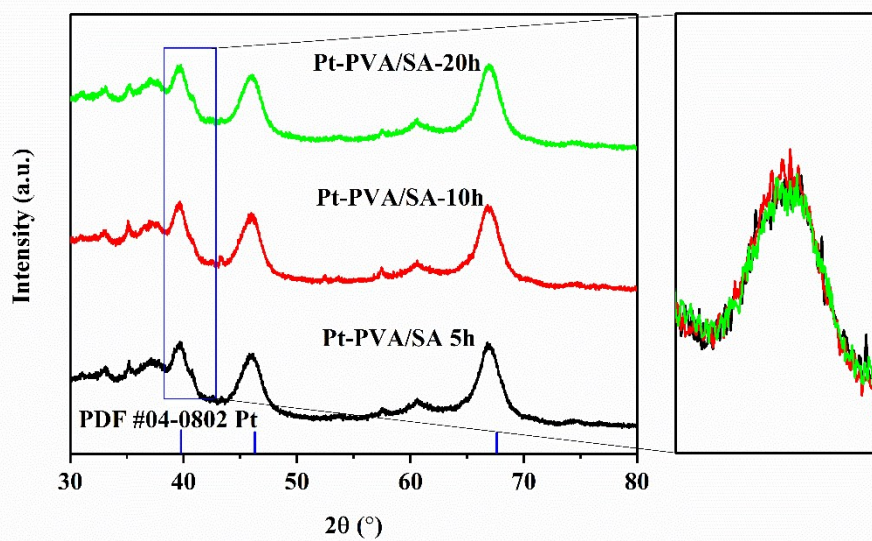

Fig. S5 XRD patterns of catalysts

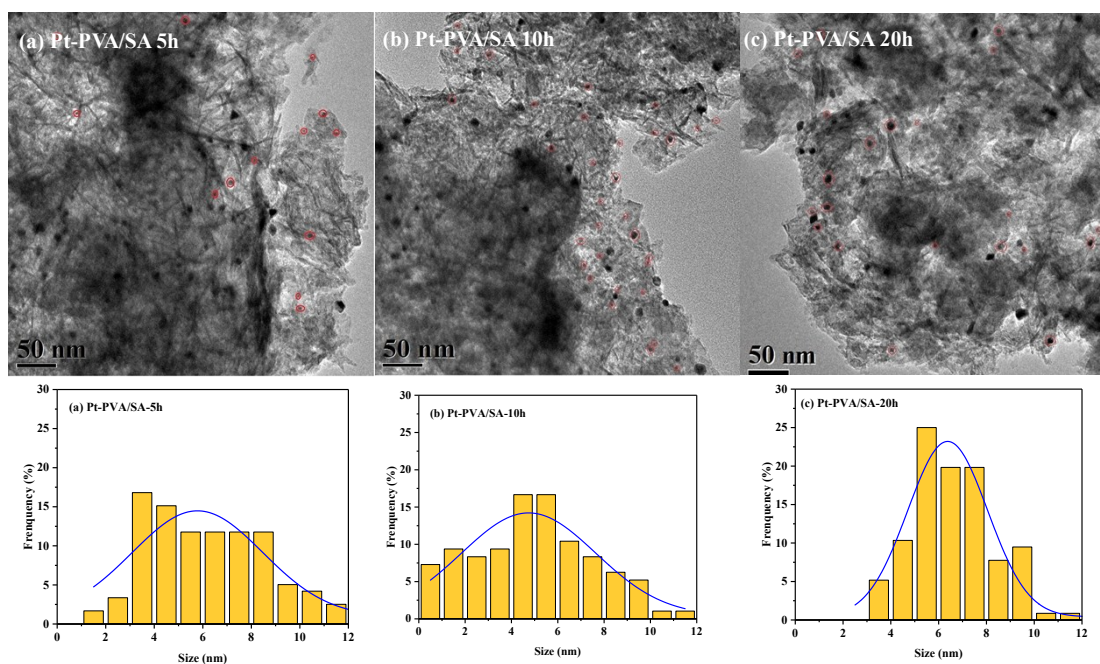

**Fig. S6** (above) TEM patterns of catalysts and partial platinum particles recorded by red circle and (below) distribution of platinum particles after counting around 100 particles and fitting by gauss.

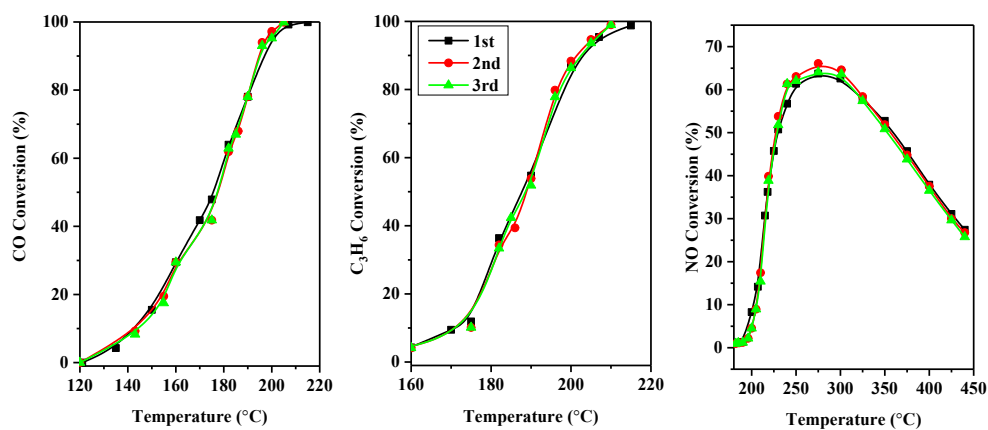

**Fig. S7.** The repeatable test of the catalytic performance on Pt-PVA/SA-10 h.

**Table S1** The dispersion and average grain size of different samples.

| Sample | Dispersion (%)  |         | Average grain size (nm) |           |
|--------|-----------------|---------|-------------------------|-----------|
|        | Quantified from | Derived | Derived from            | Statistic |
|        |                 |         |                         |           |

|                    | CO chemisorption | from TEM <sup>a</sup> | CO chemisorption <sup>b</sup> | from TEM |
|--------------------|------------------|-----------------------|-------------------------------|----------|
| Pt-PVA/SA-5h       | 21.1             | 16.2                  | 5.2                           | 6.4      |
| Pt-PVA/SA -<br>10h | 26.0             | 19.1                  | 4.2                           | 4.9      |
| Pt-PVA/SA-20h      | 15.4             | 18.1                  | 7.1                           | 6.6      |

<sup>a</sup>: TEM dispersion was estimated from particle size distributions.

<sup>b</sup>: Average grain size from CO chemisorption results ( $1.1/D$ ).
